# 1 The developmental basis for scaling of mammalian tooth size

2  
3 Mona M. Christensen<sup>1\*</sup>, Outi Hallikas<sup>1</sup>, Rishi Das Roy<sup>1</sup>, Vilma Väänänen<sup>1</sup>, Otto E.  
4 Stenberg<sup>1</sup>, Teemu J. Häkkinen<sup>2</sup>, Jean-Christophe François<sup>3</sup>, Robert J. Asher<sup>4</sup>, Ophir D.  
5 Klein<sup>2,5</sup>, Martin Holzenberger<sup>3</sup>, Jukka Jernvall<sup>1,6\*</sup>

6  
7 <sup>1</sup>Institute of Biotechnology, University of Helsinki, P.O. Box 56, FI-00014 Helsinki,  
8 Finland

9 <sup>2</sup>Department of Orofacial Sciences and Program in Craniofacial Biology, University of  
10 California, San Francisco, CA, USA

11 <sup>3</sup>Sorbonne University, INSERM, Research Center Saint-Antoine, Paris, France

12 <sup>4</sup>Department of Zoology, University of Cambridge, UK

13 <sup>5</sup>Department of Pediatrics, Cedars-Sinai Medical Center, Los Angeles, CA, USA

14 <sup>6</sup>Department of Geosciences and Geography, University of Helsinki, Helsinki, Finland

15  
16 \*Correspondence: [mona.christensen@helsinki.fi](mailto:mona.christensen@helsinki.fi), [jernvall@fastmail.fm](mailto:jernvall@fastmail.fm)

## 17 18 19 **ABSTRACT**

20 When evolution leads to differences in body size, organs generally scale along. A well-  
21 known example of the tight relationship between organ and body size is the scaling of  
22 mammalian molar teeth. To investigate how teeth scale during development and  
23 evolution, we compared molar development in mouse and rat from initiation through  
24 final size. Whereas the linear dimensions of the rat first lower molar are twice that of the  
25 mouse molar, their shapes are largely the same. We found that scaling of the molars  
26 starts early, and that the rat molar is patterned equally as fast but in a larger size than the  
27 mouse molar. Using transcriptomics, we discovered that a known regulator of body size,  
28 insulin-like growth factor 1 (*Igf1*), is more highly expressed in the rat molars compared  
29 to the mouse molars. *Ex vivo* and *in vivo* mouse models demonstrated that modulation of  
30 the IGF pathway reproduces several aspects of the observed scaling process.  
31 Furthermore, analysis of IGF1-treated mouse molars and computational modeling  
32 indicate that IGF signaling scales teeth by simultaneously enhancing growth and by  
33 inhibiting the cusp patterning program, thereby providing a relatively simple mechanism  
34 for scaling teeth during development and evolution. Finally, comparative data from  
35 shrews to elephants suggest that this scaling mechanism regulates the minimum tooth  
36 size possible, as well as the patterning potential of large teeth.

37

38

## 39 INTRODUCTION

40 Body size evolution causes fundamental changes in an organism's ecology and  
41 physiology (Peters, 1983). Changes in body size have been well documented for  
42 multiple taxonomic groups (Smith et al., 2016), and these changes in overall size are  
43 typically tightly linked to the scaling of individual body parts and organs (Damuth &  
44 MacFadden, 1990). The mammalian molar tooth is an example of an organ that scales  
45 with body size. This scaling link is so strong that, within evolutionary lineages, highly  
46 accurate estimates of body size can be made from simple linear measures of molar teeth  
47 (Damuth & MacFadden, 1990; Hopkins, 2018). The use of linear measurements to  
48 estimate body size is made possible by the relatively shape-invariant scaling of molars  
49 within mammalian lineages (Damuth & MacFadden, 1990; Copes & Schwartz, 2010;  
50 Hopkins, 2018). As a result, the fossil record of molars forms much of the basis for the  
51 reconstructions of the body size dynamics in mammalian evolution (Gingerich, 1982;  
52 Alroy, 1998; Smith et al., 2010; D'Ambrosia et al., 2017).

53 Despite an increasing understanding of the molecular mechanisms of shape and overall  
54 size regulation (Parker, 2011; Boulan & Leopold, 2021; Harmansa & Lecuit, 2021; Wu  
55 & Guan, 2020), it remains unknown how evolutionary changes in organ size are  
56 achieved while keeping shape and proportions constant. Given the central role of  
57 mammalian molars in estimating body size, we set out to investigate how the shape-  
58 invariant scaling is realized during tooth development. We took advantage of the fact  
59 that two mammalian species used in developmental research, the mouse (*Mus musculus*)  
60 and the rat (*Rattus norvegicus*), provide an example of divergent body and molar tooth  
61 size but relatively similar molar tooth shape (Fig. 1A). This shape-invariant scaling  
62 allows us to focus on size alone, without the pervasive effects of shape differences  
63 during development (Jernvall et al., 2000).

64

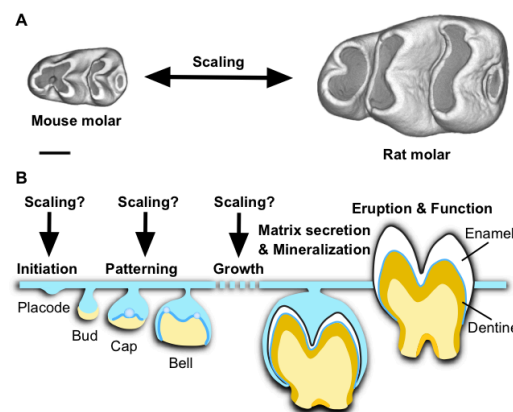

65

66 **Figure 1. Determining when teeth are scaled during development.** **A**, First lower molars of  
67 the mouse and the rat are similar in overall shape, but the rat molar is two times larger in linear  
68 dimensions. Occlusal views, anterior to the left, buccal to the top. Scale bar, 500  $\mu$ m. **B**, When  
69 and how during tooth development the scaling process occurs is not known. Tooth development  
70 is regulated by the interactions between the epithelial (blue) and mesenchymal (yellow) tissues.  
71 After mineralization and eruption, crown shape cannot be remodeled.

72

73

## 74 RESULTS

### 75 Molar scaling begins during the placode stage

76 As a first step, we established when the size differences between mouse and rat molars  
77 begin to appear during development. Specifically, we asked whether size differences  
78 become visible already during the patterning of cusps, or whether rat molars achieve  
79 their larger size through growth after patterning (**Fig. 1B**). Whereas the patterning  
80 process of mammalian teeth is well known to integrate inductive signaling and growth  
81 (Harjunmaa et al., 2014), it is not known whether and how scaling might be involved.

82 To pinpoint the onset of scaling, we compared molar development of the mouse and the  
83 rat chronologically by starting from the dental placodes. These are the earliest  
84 individualized dental structures to form when the epithelium begins to invaginate into  
85 the underlying mesenchyme. Because it is difficult to reliably delineate the size of the  
86 epithelial placode morphologically, we used *in situ* hybridization to detect gene  
87 expression of two epithelial markers, forkhead box I3 (*Foxi3*) and sonic hedgehog (*Shh*).  
88 *Foxi3* expression encompasses the entire placodal epithelium (Shirokova et al., 2013),  
89 and *Shh* is expressed within the placode in the early signaling centers, the initiation  
90 knots (Mogollon et al., 2021).

91 When multiple placodes are examined, *Foxi3* expression domains overlap in size  
92 between the species (**Fig. 2A**,  $p = 0.1626$ , all  $p$ -values determined using two-tailed  
93 randomization test, **Table S1**). This suggests that the overall sizes of the placodal  
94 epithelia are similar in the species. However, *Shh* expression domain, which is  
95 upregulated within the placode in the initiation knot (Mogollon et al., 2021), is slightly  
96 larger in the rat than in the mouse (**Fig. 2B**,  $p = 0.0008$ , **Table S1**). Formation of the  
97 initiation knot marks the beginning of the transition from placode to bud stage, and this  
98 step appears to also mark the beginning of scaling.

99

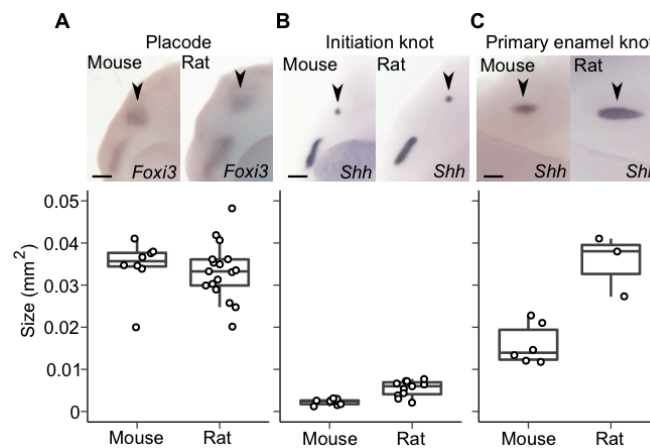

100  
101  
102  
103  
104  
105  
106  
107  
108  
109  
110

**Figure 2. Tooth scaling begins during the placode stage of molar development. A**, The epithelial placodes (black arrowheads) are similar in size in the rat ( $n = 17$ ) and mouse molar, visualized using *Foxi3* expression ( $n = 8$ , randomization test  $p = 0.1626$ ). **B**, The initiation knots (black arrowheads, visualized using *Shh* expression) are larger in the rat ( $n = 11$ ) than in the mouse ( $n = 9$ ,  $p = 0.0008$ ). **C**, The primary enamel knots (black arrowheads, visualized using *Shh* expression) are larger in the rat ( $n = 3$ ) than in the mouse ( $n = 6$ ,  $p = 0.0131$ ). Boxes enclose 50% of observations, the horizontal bar denotes the median, and whiskers extend to last values within 1.5 interquartiles. For the images, anterior is to the left, buccal to the top. Scale bars, 200  $\mu$ m.

111 Examining the expression patterns in more detail shows that the size difference between  
112 the mouse and rat is driven by an increasing difference along the longitudinal axis  
113 (**Table S1**). This difference becomes more pronounced when the primary enamel knot  
114 appears two days after the placode stage in both species (day E14 and E16 in the mouse  
115 and the rat, respectively). The primary enamel knot is an epithelial signaling center that  
116 forms towards the end of the bud stage when the invaginated epithelial bud starts to  
117 grow lateral folds called the cervical loops. Cervical loop growth marks the onset of the  
118 cap stage, during which tooth crown morphogenesis begins. The rat primary enamel  
119 knot, detected with *Shh* expression, is roughly twice as large in area as that of the mouse  
120 (**Fig. 2C, Table S1**), suggesting a marked difference in signaling activity between the  
121 species at the onset of crown formation. Overall, scaling of tooth size appears to start  
122 before the active patterning of cusps.

123

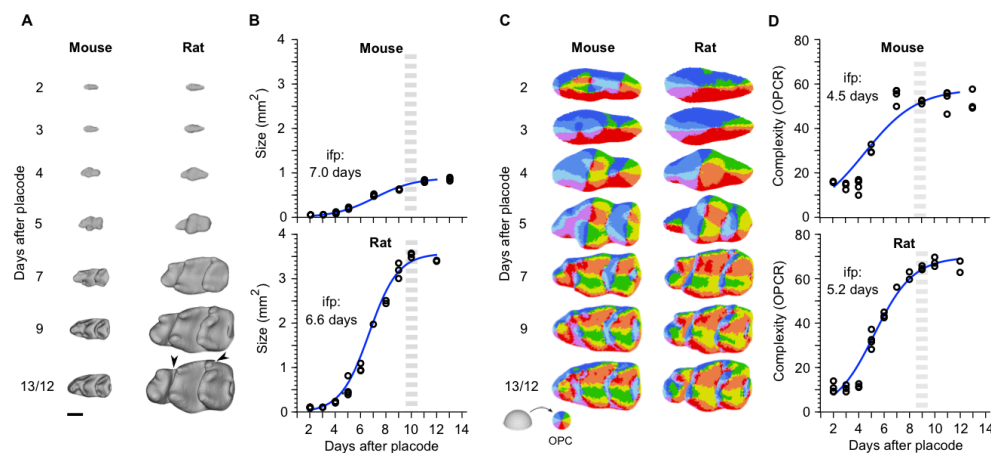

124

125 **Figure 3. Despite accelerated growth in size, rat molar patterning is similar to mouse**  
126 **molar patterning.** **A**, 3D-reconstructions show rat molars becoming progressively larger  
127 throughout development ( $n = 26$  and  $28$  for mouse and rat). **B**, Despite the much faster growth of  
128 the rat molar, logistic curves fitted to the areas indicate comparable time points for the onset of  
129 growth deceleration (inflection point, ifp) and reaching of the final tooth size (grey dashed line).  
130 For logistic curve to calculate the size  $S(t) = K/(1+Ae^{-kt})$ ;  $K$ ,  $A$ , and  $k$  are  $0.9$ ,  $80.9$ , and  $0.62$  for the  
131 mouse, and  $33.6$ ,  $350$ , and  $0.88$  for the rat, respectively. **C**, OPC maps of dental complexity  
132 show generally comparable progression of patterning. **D**, Compared to the size, logistic curves  
133 fitted to the OPCR values are relatively similar between the species, the inflection point being  
134 slightly earlier in the mouse. For logistic curve to calculate the OPC  $O(t) = K/(1+Ae^{-kt})$ ;  $K$ ,  $A$ , and  $k$   
135 are  $57.8$ ,  $8.6$ , and  $0.48$  for the mouse, and  $69.8$ ,  $29.6$ , and  $0.65$  for the rat, respectively. The  
136 higher OPCR values of the rat molar reflect its more distinct anteroconid and an additional  
137 distobuccal cusp (arrowheads in **A**). Anterior to the left, buccal to the top. Scale bar,  $500 \mu\text{m}$  in  
138 (**A**).  
139

### 140 Molar scaling encompasses all the patterning stages

141 To examine whether scaling is a significant factor affecting growth during patterning,  
142 we analyzed developing crown morphologies. From the cap stage onwards, size  
143 measurements can be carried out using three-dimensional reconstructions. We used soft-  
144 tissue  $\mu\text{CT}$  imaging to reconstruct both the size and shape of the growing molars  
145 (Methods). To quantify the overall progression of patterning in which individual cusps  
146 become gradually identifiable, we used Orientation Patch Count (OPC) to measure  
147 surface complexity (Evans et al., 2007).

148 Aligning the growth series of mouse and rat molars based on days after placode  
149 initiation makes it apparent that rat molars grow substantially faster (**Fig. 3A**). When

150 plotted (using  $\text{mm}^2$ , **Fig. 3B**, **Table S2**), both molars appear to achieve their final sizes  
151 within about 10 days after the placode stage. Logistic growth models fitted for the data  
152 suggest that the inflection points, after which the growth begins to slow down, occur  
153 close to seven days after the placode stage (day E19 and E21 for the mouse and rat,  
154 respectively, **Fig. 3B**). Considering that the stage with final number of main cusps is  
155 separated by seven days from the placode stage in both species (**Fig. 3A**), scaling  
156 appears to encompass all the stages of cusp patterning. Indeed, in contrast to the  
157 pronounced differences in size, OPC values show largely similar increases of  
158 topographic complexity in the two species (**Fig. 3C, D**, **Table S2**). The slightly higher  
159 OPC values of the rat molar reflect its more distinct anterior part of the crown  
160 (anteroconid) and an additional distobuccal cusp (arrowheads in **Fig. 3A**). The inflection  
161 points of increase in complexity precede those of the increase in size by 2.5 and 1.4 days  
162 for the mouse and rat, respectively (**Fig. 3D**), further indicating that patterning is  
163 embedded within the scaling process of teeth.

164 Taken together, these results point to largely comparable rates of shape development  
165 between the mouse and the rat molars, although the teeth themselves increase in size at  
166 very different rates. A major implication of this observation is that the patterning  
167 happens in tissue domains that differ in size. This in turn indicates that the patterning  
168 process itself scales.

169

#### 170 **Scaling of patterning involves changes in spacing of signaling centers**

171 Morphological appearance of cusps is preceded up to one day by the formation of  
172 transient signaling centers, called the secondary enamel knots, that differentiate at the  
173 locations of the future cusps (Jernvall et al., 2000). Because the OPC analysis shows that  
174 patterning occurs in larger size in the rat (**Fig. 3**), we used the expression of fibroblast  
175 growth factor 4 (*Fgf4*) to examine whether the spacing of the secondary enamel knots  
176 also differs between the mouse and rat (**Fig. 4A**). The results confirm that during the  
177 patterning stage the rat molar is not only larger than the mouse molar, but also that the  
178 secondary enamel knots are more spread apart (**Fig. 4A, b**,  $p = 0.0001$  for both size and  
179 patterning, **Table S3**). Thus, the scaling of tooth size appears to be linked to the  
180 dynamics of patterning regulation, and not, for example, to cell size differences between  
181 the species (**Fig. S1**).

182

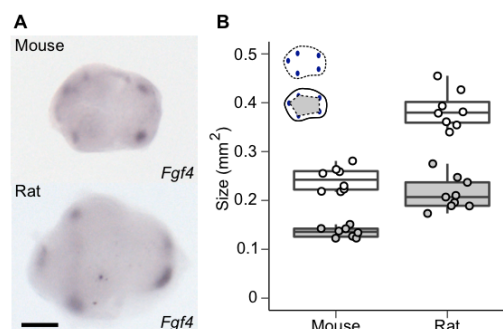

183

184 **Figure 4. Scaling of patterning involves changes in tooth size and spacing of signaling**  
185 **centers. A**, Secondary enamel knots visualized using *in situ* hybridization of *Fgf4* expression in  
186 the mouse and rat molar. **B**, The rat molar is larger (size shown with white points,  $n = 8$ ), and the  
187 secondary enamel knots are more spread apart (patterning area shown with grey points,  $n = 9$ )  
188 than in the mouse molar ( $n = 8$  for both measurements). All  $p$ -values are 0.0001. Boxes enclose  
189 50% of observations, the horizontal bar denotes the median, and whiskers extend to last values  
190 within 1.5 interquartiles. Anterior to the left, buccal to the top. Scale bar, 200  $\mu\text{m}$ .



191

192 **Modifying IGF1 signaling is sufficient to scale both size and patterning**

193 Next, we examined how signaling and regulation of proliferation are integrated to scale  
 194 teeth. To identify molecular mechanisms that could explain the scaling of both tooth size  
 195 and patterning, we first used RNA sequencing (RNAseq) to compare gene expression  
 196 between the two species. We performed RNAseq analyses for mouse and rat molars that  
 197 were one, three, and four days from the placode stage (corresponding to bud, late cap,  
 198 and bell stages, Methods). Although the overall expression levels of genes required for  
 199 normal tooth development are highly comparable between the species (Hallikas et al.,  
 200 2021), we found that many genes of the insulin-like growth factor (*Igf*) pathway were  
 201 expressed at higher levels in the rat than in the mouse molar (Fig. 5A, Table S4). In  
 202 particular, *Igf1* was consistently expressed at much higher levels in the rat (Fig. 5A,  
 203 Table S4), and *Igf2*, which also functions through the IGF1 receptor, showed higher  
 204 expression levels in the later stages of the rat molar development (Table S4). Moreover,  
 205 several of the genes encoding IGF-binding proteins (IGFBPs) that modulate local IGF1-  
 206 signaling were highly expressed in the rat molar (Table S4). The IGF1 receptor  
 207 mediated pathway is required for various aspects of tissue growth, such as proliferation  
 208 and survival (Dupont & Holzenberger, 2003; LeRoith et al., 2021), and it is well  
 209 established as a regulator of body size in dogs, humans and mice (Woods et al., 1996;  
 210 Sjögren et al., 1999; Sutter et al., 2007). Whereas IGF1 functions postnatally mainly as a  
 211 liver-derived endocrine hormone (Sjögren et al., 1999), the expression of *Igf1*, *Igf2*, and  
 212 their receptor *Igf1r* in developing teeth (Joseph et al., 1994, Table S4) suggest a  
 213 paracrine involvement of IGF signaling in tooth size regulation. Later during tooth  
 214 development, IGF signaling is also important for tooth attachment to the jaw, as it  
 215 regulates periodontal ligament formation (Jing et al., 2022).

216

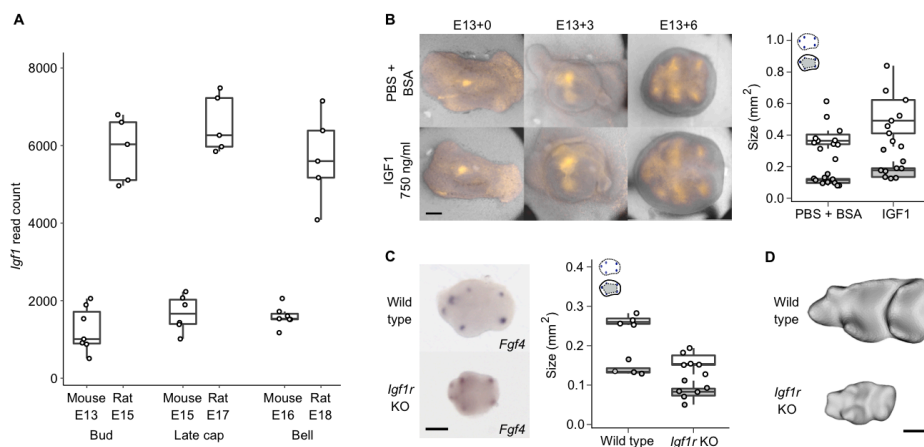

217

218

219

220

221

222

223

224

225

226

227

228

**Figure 5. Modifying IGF1 signaling is sufficient to scale both tooth size and cusp patterning.** **A**, *Igf1* is upregulated in the rat molars ( $n = 5$  for all stages) compared to mouse molars ( $n = 7$  per stage except late cap stage  $n = 6$ ). **B**, IGF1-treated molars are larger ( $n = 9$ ,  $p = 0.0339$ ) and have more spread secondary enamel knots *ex vivo* ( $n = 9$ ,  $p = 0.0001$ ) than the controls ( $n = 11$  for both measurements). **C**, *Igf1r* KO mouse molars are smaller (E18,  $n = 6$ ,  $p < 0.0045$ ) and their secondary enamel knots are less spread ( $n = 6$ ,  $p < 0.0055$ ) than those of wild type mouse molars (E17,  $n = 4$ ). **D**, Wild type and *Igf1r* KO mouse molars at E19 when all the main cusps are visible. Boxes enclose 50% of observations, the horizontal bar denotes the median, and whiskers extend to last values within 1.5 interquartiles. Anterior to the left, buccal to the top. Scale bars, 200  $\mu\text{m}$ .

229 To analyze the effects of IGF signaling on molar development experimentally, we first  
230 tested whether the IGF1 protein is capable of scaling up mouse molars *ex vivo*. IGF1 has  
231 been reported to increase tooth size in cultured or bioengineered molars (Young, 1995;  
232 Oyanagi et al., 2016), but its effects on normal patterning of enamel knots and cusps  
233 have not been studied. To visualize cusp patterning in culture, we used Fucci-red cell-  
234 cycle reporter mice and cultured their molars from bud stage (E13.5) with or without  
235 recombinant IGF1 protein (Methods). As the secondary enamel knots are non-  
236 proliferative, they become visible in Fucci-red mice before differentiation of the rest of  
237 the crown. We found that the size of IGF1-treated teeth is 1.35 times larger on average  
238 than that of the controls (**Fig. 5B**,  $p = 0.0339$ , **Table S5**). Similarly, the spacing of the  
239 secondary enamel knots of the treated teeth has increased in unison with the tooth size  
240 (**Fig. 5B**,  $p < 0.0001$ , **Table S5**), suggesting that excess IGF1 can both increase tooth  
241 size and scale the patterning so that the shape remains the same.

242 To examine how dependent tooth development is on canonical IGF signaling, we used  
243 an *in vivo* model of the *Igflr* null mutant (*Igflr*-KO) mouse (Holzenberger et al., 2003).  
244 Because these mice die perinatally, we analyzed the embryonic development of the  
245 molars (Methods). *Fgf4* expression in bell stage molars showed reduced spacing of the  
246 secondary enamel knots ( $p = 0.0055$ ), as well as reduced tooth size, in the *Igflr*-KO  
247 molars (**Fig. 5C**,  $p = 0.0045$ , **Table S6**), suggesting that the patterning process is  
248 downscaled in the mutant teeth. At E19, the *Igflr*-KO molars have acquired all the main  
249 cusps even though they are only 0.33 in size compared to the corresponding wild type  
250 mouse molars (**Fig. 5D**, **Table S2**).

251 Taken together, IGF signaling appears to be sufficient to change both the size of the  
252 tooth and the patterning process, which in combination provides a mechanism for shape-  
253 invariant scaling. This inference raises the question of how IGF1 affects induction of  
254 secondary enamel knots, because the characteristic roles of IGF signaling are associated  
255 with growth and metabolism (Dupont & Holzenberger 2003; LeRoith et al., 2021), not  
256 patterning.

257

## 258 **IGF1 inhibits the expression of genes required for cusp patterning**

259 To identify the downstream effects of IGF1 signaling in teeth, we treated cap stage  
260 (E14) mouse lower molars with recombinant IGF1 protein for 6 hours (Methods)  
261 followed by RNAseq analysis of differential gene expression. The IGF1 treatment shows  
262 the expected bias towards upregulation of metabolic and biosynthesis related genes (**Fig.**  
263 **S2A**), whereas the downregulated genes appear to be related to developmental regulation  
264 (**Fig. S2B**). A closer examination of these results shows that several DNA replication  
265 markers were upregulated by IGF1 (**Fig. 6A**), implicating stimulation of cell  
266 proliferation. In strong contrast, there was a total lack of upregulation of any of the  
267 known developmental genes (Hallikas et al., 2021) required for normal tooth  
268 morphogenesis (**Fig. 6B**, **Table S7**). Instead, we found eight tooth genes to be  
269 downregulated ( $p < 0.05$  **Fig. 6B**, **Table S7**), five of which are expressed in the enamel  
270 knots. Of the downregulated genes, *Lef1* and *Bmp4* are required for the induction of the  
271 molar enamel knots (Sasaki et al., 2005; Jia et al., 2013), while the others alter cusp  
272 patterns when mutated (Hallikas et al., 2021). Overall, IGF signaling appears to have a  
273 dual role in tooth development: induction of growth and, at the same time, inhibition of  
274 enamel knot driven cusp patterning. This result may also help to explain why attempts to  
275 increase tooth size experimentally by increasing tissue size or by recombining tissues  
276 lead to an increase in cusp number (Cai et al., 2007; Ishida et al., 2011).

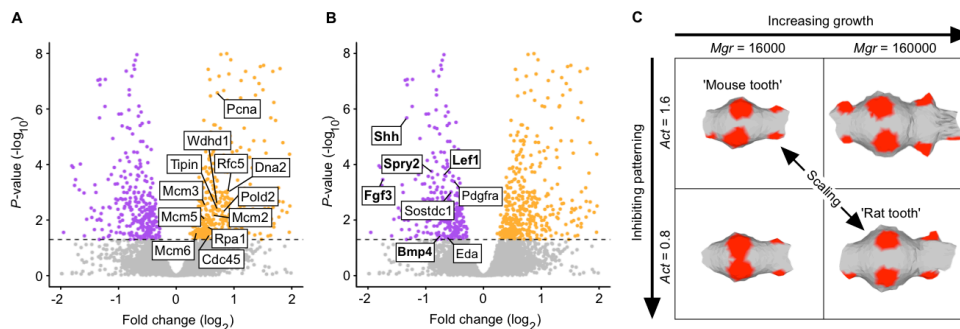

277

278

279

280

281

282

283

284

285

286

287

288

289

290

**Figure 6. Simultaneous promotion of overall growth and inhibition of cusp patterning by IGF1 provides a mechanism to scale teeth.** **A**, Mouse molars treated with IGF1 protein for six hours show upregulation (orange) of 12 DNA replication markers (GO:0006260),  $n = 5$  for both the treatments and controls. **B**, In contrast to growth promoting effects (**A**), genes required for normal tooth development show only downregulation in IGF1-treated molars (downregulated genes in purple). Enamel knot expressed genes are in bold. Horizontal line denotes  $p_{adj} = 0.05$ . Volcano plots are zoomed to the genes of interest, see **Fig. S2** for the overall fold enrichment of GO categories. **C**, Computer simulations of molar development using ToothMaker show that changing proliferation rate (*Mgr*) or activator autoregulation (*Act*) alone changes the pattern (forming secondary enamel knot regions shown in red). By increasing growth and by decreasing activation, which mimics the effects in (**A**) and (**B**), the simulated mouse tooth can be scaled up. See text and Methods for details.

291

292

293

294

295

296

297

298

299

300

301

302

303

304

305

306

307

308

309

310

To further investigate the principle of dual requirement of growth and patterning regulating scaling, we used a computational model of tooth development to scale teeth (ToothMaker; ref. Harjunmaa et al., 2014). This morphodynamic model integrates signaling and tissue growth to simulate tooth development, and it has been used in experimental and evolutionary studies (Harjunmaa et al., 2014, Renvoise et al., 2017; Savriama et al., 2018; Couzens et al., 2021; Thiery et al., 2022), but not to examine scaling. As a starting point, we used the simulated mouse molar from previous studies (Harjunmaa et al., 2014, Renvoise et al., 2017) and increased its size (Methods). Increasing only the growth resulted in additional secondary enamel knots and altered cusp pattern (**Fig. 6C**, **Table S8**). However, by simultaneously decreasing the activator required for enamel knot induction, we obtained a larger tooth that retains the mouse pattern with more widely spread enamel knots (**Fig. 6C**, **Table S8**). Decreasing activation resulted in the requirement of a larger number of activator producing cells, hence larger size, to reach the threshold to induce the secondary enamel knots. Taken together, we interpret these results to support the role of IGF signaling, likely through changes in many of the pathway genes (**Table S4**), as a single 'dial' that simultaneously promotes growth and inhibits patterning.

311

312

313

314

315

316

317

318

### Comparative data on mammalian teeth support universality of the scaling mechanism

Because our inferences on the scaling of patterning were based on two murine species, we wanted to examine a broader range of species and sizes. Here we took advantage of our observation that differences in tooth width between the mouse and rat appear to become discernable relatively late, beginning with the cap stage (**Fig. 3A**, **Table S1**, **S2**). Frontal histological sections of cap-stage teeth are available for different species in the literature as also in museum collections, providing data to use tooth width as a proxy for tooth size (**Fig. 7A**, **Methods**, **Table S9**). We therefore measured early cap-stage widths from developing molars and corresponding fully formed tooth widths of 14 mammalian



319 species, ranging in size from the shrew (*Sorex araneus*) to the elephant (*Loxodonta*  
320 *africana*) (**Table S9**). The measurements show that even though these teeth vary over  
321 74-fold in final, mineralized width, the early cap-stage widths exhibit very little change  
322 in size (**Fig. 7B, Table S10**). This means that whereas the fully formed teeth scale with  
323 body size, the early cap stage tooth germs are relatively size-invariant.

324

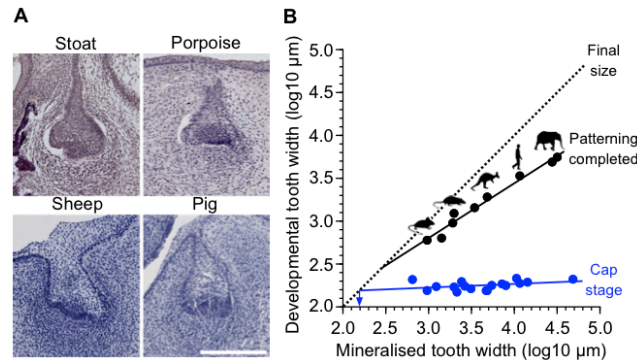

325 **Figure 7. Patterning scales across mammals.** **A**, Frontal sections of developing teeth of  
326 various mammals show similar bucco-lingual widths of tooth germs at early cap stage. The  
327 sections show dp4 (sheep), p4 (stoat), and dp3 (pig). The porpoise tooth identity cannot be  
328 determined. **B**, The cap stage widths (blue) do not show a marked increase with the final  
329 mineralized tooth widths (regression slope is 0.043 and the intercept is 2.095,  $r^2 = 0.163$ ), and  
330 the regression-line extrapolated minimum tooth width is 154 μm for single cusped teeth (arrow).  
331 In contrast, the widths when the patterning is completed increase as the teeth become larger  
332 (black line, regression slope is 0.640 and the intercept is 0.885,  $r^2 = 0.976$ ). The point when  
333 tooth development reaches the final tooth size is marked with the dashed diagonal (x- and y-axis  
334 values are the same). For sample details, see **Table S9**. Scale bar, 200 μm in (**A**).

336

337 The fully formed, final tooth size can be expected to be close to the cap-stage width in  
338 single cusped teeth when their cervical loops grow directly downwards. The average  
339 width of our cap-stage measurements was 178 μm (**Table S9**). Taking into account the  
340 regression slope, the extrapolated minimum width for the cap stage would be even  
341 smaller at 154 μm, suggesting this as the theoretical lower limit for tooth size in  
342 mammals (arrow at 2.2 log10 in **Fig. 7B, Table S10**). Notwithstanding that this limit  
343 should be considered an approximation (**Table S10**), it is still instructive to consider the  
344 empirical data. Mammalian teeth can be less than 500 μm in diameter, even with  
345 multiple cusps such as the mouse third molars. Experimentally, extreme reduction in  
346 tooth size has been achieved in mice with activated epithelial Wnt signaling (Järvinen et  
347 al., 2006). In these mice, teeth are continuously generated, typically with round, peg-like  
348 morphology (Järvinen et al., 2006). As the size distribution of these teeth has not been  
349 examined previously, we quantified the sizes of 42 mineralised teeth obtained from a  
350 single molar germ transplant experiment, cultured under the kidney capsule (Järvinen et  
351 al., 2006). The frequency distribution of the teeth shows (**Fig. S3**) that, towards the  
352 smaller teeth, their size distribution falls steeply around 200 μm, with only one tooth  
353 being clearly narrower than the predicted minimum (98 versus 154 μm). Moreover, teeth  
354 with two well-differentiated cusps appear to be at least about 400 μm wide (**Fig. S3**).

355 Although the data to compare scaling of patterning are more limited, we nonetheless  
356 obtained tooth widths for seven species at the stages when the last forming cusps have  
357 just been initiated during ontogeny (Methods, **Table S9**). Unlike the early cap-stage  
358 tooth germs, these fully patterned teeth scale with the final tooth width (**Fig. 7B**).  
359 Considering again the widths of developing teeth, the best-fit line for cap stage teeth

360 extrapolated towards zero overlaps with a theoretical minimum at 286  $\mu\text{m}$  (2.5 log<sub>10</sub> in  
361 **Fig. 7B, Table S10**). This indicates that patterning is truncated in smaller teeth and  
362 agrees with the lack of teeth with second cusps in the transplant experiment (**Fig. S3**).  
363 To the extent that these values are representative of mammalian tooth development in  
364 general, the downscaling capacity of teeth appears to be progressively constrained when  
365 teeth become less than half a millimeter in diameter.

366 For larger teeth, the consequence of the size-invariant initiation, followed by the scaling  
367 of the patterning, is a progressive increase of growth during patterning as the teeth  
368 become larger. For example, whereas linear size in the mouse increases by 3.8 times in  
369 the cap stage relative to the end of the patterning, the comparable increase is 15.4 times  
370 in the human (calculated for 1 mm and 10 mm sized teeth, respectively). After  
371 patterning, the final increases in tooth sizes are 1.6 and 3.6 times for the mouse and  
372 human, which are only about 0.4 and 0.2 times the comparable increases during  
373 patterning, respectively. In other words, patterning of larger teeth encompasses an  
374 increasingly large share of the cell divisions needed to reach the final size (**Fig. 7B**).

375

## 376 **DISCUSSION**

377 Evolution of tooth size has had a central role in the reconstruction of body size evolution  
378 in mammals (Damuth & MacFadden, 1990; Gingerich, 1982; Damuth & MacFadden,  
379 1990; Alroy, 1998; Smith et al., 2010; Smith et al., 2016; D'Ambrosia et al., 2017).  
380 Also, as size affects many aspects of an animal's ecology, size changes alone are often  
381 used as a diagnostic feature to delineate species. Evolutionary changes in body size have  
382 been frequent in mammalian evolution, and tooth size seems to track these changes  
383 closely, although with a slight delay when the change is very fast (e.g. domesticated  
384 mammals, see Clauss et al., 2022). Here we investigated how the scaling of teeth can be  
385 achieved during development. Comparisons of mouse and rat molars show that scaling is  
386 already active during the patterning phase of tooth development. Tooth patterning,  
387 which is responsible for the formation of species-specific cusp patterns, is a critical  
388 period of morphogenesis that is sensitive to mutations in many regulatory genes  
389 (Hallikas et al., 2021). Our experimental data and modeling results implicate IGF  
390 signaling as a mechanism for scaling both the patterning and the size. This includes the  
391 well-established role of IGF signaling in promoting growth (Dupont & Holzenberger,  
392 2003; LeRoith et al., 2021), and also the regulation of secondary enamel knots by  
393 inhibiting their activation (**Figs 5, 6**). This in turn would result in the requirement for a  
394 larger number of cells, and larger size, to reach the signaling threshold for cusp  
395 formation in larger teeth (**Fig. 6C**). More generally, our results further underscore the  
396 diverse roles that IGF signaling appears to play in developing teeth (Koffi et al., 2021;  
397 Jing et al., 2022).

398 One obvious question that arises from these analyses is why should scaling and  
399 patterning be integrated. One possible answer is that larger teeth retain patterning control  
400 for a progressively larger share of their increase in size (**Fig. 7B**), which in turn may  
401 minimize accumulation of harmful changes in shape caused by growth alone. Upscaling  
402 the patterning may also have the side effect of allowing large teeth to elaborate cusp  
403 patterns for longer periods of developmental time. cursory analyses of dental diversity  
404 have shown that larger teeth tend to have more cusps (Jernvall, 1995), and this could be  
405 in part due to the scaling of patterning. Another contributing factor in the increase of  
406 cusp number in larger teeth is the prevalence of herbivory in large mammals. Herbivores

407 have relatively complex teeth (Evans et al., 2007), which are presumably easier to  
408 achieve as the teeth become larger.

409 The predicted minimum tooth sizes with single and additional cusps (**Fig. S3, Tables S9,**  
410 **S10**) may be relatively close to some of the teeth in early mammaliforms (Luo, 2007;  
411 Gill et al., 2014). Making even smaller teeth might require smaller cell size, or  
412 alternative mechanisms for patterning (Larionova et al., 2021). Small multicusped teeth  
413 do occur in reptiles (Lafuma et al., 2021) and fish (Streelman et al., 2003); at least in  
414 sharks tooth cusp patterning has been proposed to be relatively mammal-like (Thiery et  
415 al., 2022).

416 The mammalian dentition evolved from a common ancestor with relatively simple teeth  
417 lacking lateral cusps (e.g., Gill et al., 2014). The subsequent lateral expansion can be  
418 considered an evolutionary novelty and a prerequisite for the acquisition of tribosphenic  
419 molars which combine slicing and crushing functions (Luo, 2007; Gill et al., 2014;  
420 Couzens et al., 2021). The sequence of evolutionary changes leading to tribospheny may  
421 explain the relatively late onset of lateral expansion of molars during development (**Fig.**  
422 **2, 3, Table S1, S2**). This stepwise development also enables the continuing  
423 differentiation of dentitions into laterally expanded molars and laterally narrow anterior  
424 teeth, and suggests that shape-invariant scaling of teeth is not the developmental default  
425 but an actively retained scaling relationship involving all the steps of morphogenesis.

426 Because organs generally scale with body size, we predict that comparable scaling of  
427 patterning, possibly driven by IGF signaling, may occur in most organs. At least in the  
428 case of teeth, which have determinate growth, the final tooth size can be used to predict  
429 the size of patterning phase during development. Thus, in addition to being useful in  
430 inferring body size, tooth size is also informative about development.

431

## 432 **MATERIALS AND METHODS**

433 **Animals.** All mouse and rat studies were approved and carried out in accordance with  
434 the guidelines of the Finnish national animal experimentation board under licenses  
435 KEK16-021, KEK19-019 (mice) and KEK17-026, KEK14-026 and KEK13-014 (rats).  
436 We used wild type outbred NMRI mice and RccHan:Wist Wistar rats for micro-  
437 computed tomography and *in situ* hybridization and inbred C57BL/6JolaHsd mice and  
438 DA/HanRj rats for transcriptomics. Tissue culture experiments were carried out using  
439 Fucci mouse line expressing nuclear red (mKO-Cdt1) in G1 cell cycle phase in NMRI  
440 background (Sakaue-Sawano et al., 2008). IGF1R-KO mice (Holzenberger et al., 2000,  
441 2003) were kept in outbred 129S2/SvPasCrl background. Embryo age was determined  
442 based on vaginal plug appearance (embryonic day, E0). We confirmed the comparable  
443 dental stage by comparison of tooth morphology and the appearance of dental signaling  
444 centers.

445

446 **Micro-computed tomography ( $\mu$ CT).** Mandibles of E13-E17 mouse and E15-20 rat  
447 embryos were fixed overnight in 4% paraformaldehyde, dehydrated gradually to 70%  
448 ethanol and stored at +4 °C. Postnatal mandibles were fixed in 4% PFA for 1-2 days  
449 (depending on size) and gradually dehydrated to 70% ethanol. Phosphotungstic acid  
450 (PTA) was used to increase soft-tissue contrast for  $\mu$ CT imaging (Metscher, 2009).  
451 Samples were stained in 0.3% PTA (Sigma Aldrich) in 70% ethanol for 48-72 hours at  
452 +4 °C and stored in 70% ethanol. For scanning, samples were embedded in 1% low-  
453 melting point agarose dissolved in MilliQ water. Scanning was carried out using Bruker

454 1272  $\mu$ CT scanner with polychromatic cone beam X-ray source (Hamamatsu L11871  
455 20, 20-100 kV), 11-Megapixel xiRAY X-ray CCD camera with Onsemi KAI-11002  
456 sensor fiber-optically coupled to P43 scintillator. Embryonic samples were scanned  
457 using 0.25 mm aluminum filter at 60 kV and 166  $\mu$ A. Postnatal samples were scanned  
458 using 0.5 mm aluminum filter at 70 kV and 142  $\mu$ A. The voxel size used varied between  
459 1-4  $\mu$ m depending on the specimen size. Reconstruction was carried out using Bruker  
460 NRecon software (version 1.6.10.1), and ring artefact correction was used when  
461 necessary. Scanning of two *Loxodonta* fetuses (University Museum of Zoology  
462 Cambridge or UMZC 2011.10.1 and UMZC 2013.7) followed PTA staining protocols in  
463 Table 2 of (Metscher, 2009). Both specimens were scanned at the Cambridge  
464 Biotomography Centre on a Nikon-Xtek H-225-ST. UMZC 2013.7 was in 0.3% PTA  
465 solution for 8 weeks and scanned using 0.5 to 1 mm copper filters at 140-142 kV and  
466 240-340  $\mu$ A; UMZC 2011.10.1 was in 0.3% PTA for 1 week and scanned without a  
467 filter at 110 kV and 167  $\mu$ A.

468

469 **Segmentation and tooth measurements.** Segmentation of molars was carried out using  
470 Avizo (release 9.0.1). The epithelium was segmented manually using lasso tool, and the  
471 mesenchyme using brush tool. Every 3<sup>rd</sup> to 5<sup>th</sup> section was drawn and the sections in  
472 between interpolated, but the accuracy of automatic interpolation was confirmed  
473 manually in each section, and corrected when necessary. After segmentation, the binary  
474 stack was opened in Fiji (Schindelin et al., 2012) and smoothed using Gaussian blur 3D-  
475 tool with x, y and z sigma of 3. A standard deviation Z-project was taken from occlusal  
476 side and the tooth was measured using magic wand (area) and bounding box (maximum  
477 antero-posterior length and bucco-lingual width). Logistic curve fitting was done with  
478 PAST (Hammer et al., 2001). We report the results using two-dimensional areas because  
479 they are commonly used in evolutionary analyses, and because these were obtainable for  
480 both *in vivo* and *ex vivo* data. For measurements from histological section, the bucco-  
481 lingual widths of teeth of different species were acquired from the Museum of Natural  
482 History Berlin, Germany. Histological slides were imaged using Zeiss Axioskop, Plan-  
483 Neofluar 5x objective and Leica DFC490 camera. Additional measurements were done  
484 from the literature (**Table S9**).

485

486 **Orientation patch count.** For OPC measurements the segmented mesenchymes were  
487 saved as .stl surfaces using Fiji 3D viewer. The surfaces were handled in Meshlab  
488 (version 2021.10). The faces were inverted and the basal surface of the mesenchyme was  
489 removed using the Z-painting tool to limit the analysis only to the occlusal surface.  
490 Teeth were oriented and the scan resolution differences were corrected for by dividing  
491 the original face number with  $((4/x)^2)$  where x is the original resolution of the scan in  
492 micrometers. The acquired value was used as target number of faces in quadric edge  
493 collapse decimation tool. The surfaces were smoothed with 50 steps using Laplacian  
494 smooth to remove segmentation artifacts and to focus on the overall surface topography,  
495 and simplified to 4000 faces each using quadric edge collapse decimation with planar  
496 simplification weight set to one, in order to produce relatively uniform distribution of  
497 triangles. Although the use of a similar face count is used to remove the effect of size,  
498 we note that this procedure still results in smaller triangles in teeth with low relief. In our  
499 data this does not affect the pattern of results because the relief increase similarly  
500 between the species. OPC values (OPCR) of resolution-corrected surfaces were acquired  
501 using Morphotester (version 11.2, Winchester, 2016) with a minimum patch count of 6  
502 (roughly matching 3 pixels in raster based OPC). Visualization was done with modified  
503 R script in molarR (Pampush et al., 2016).



504

505 **Probe synthesis.** For interspecies comparison, species-specific probes were designed for  
506 each marker. Probes were designed to bind the same part of the mRNA in each species.  
507 Species-specific primers used for preparing probes are listed below. cDNA was prepared  
508 from mouse and rat embryonic molar tooth RNA (extracted using RNeasy Plus Micro  
509 kit, Qiagen, Düsseldorf, Germany). cDNA constructs were inserted in TOPO II PCR-  
510 plasmids and using TOPO TA Cloning kit with chemically competent cells according to  
511 manufacturer's protocol (Thermo Fisher Scientific, Waltham, Massachusetts, U.S.).  
512 Prior to *in vitro* RNA synthesis, plasmids were extracted using Miniprep kit (Qiagen,  
513 Düsseldorf, Germany). Plasmids were linearized and probes were prepared as described  
514 in Wilkinson & Nieto (1993) using digoxigenin-conjugated nucleotides (Roche, Basel,  
515 Switzerland). Sense probes were used to confirm specificity of the antisense probes. The  
516 following primers were used (forward and reverse primers are listed respectively):  
517 CGTAAGTCCTTACCAGCTTG and GCTGACCCCTTTAGCCTACA for mouse  
518 *Shh*, CTTAGATCCTTCACTA ACTTGGTG and GCTGACCCCTTTAGCCTACA for  
519 rat *Shh*, GGAAGGGTAATTACTGGACTC and ATGAGGCTGTTGACCATGCTG for  
520 mouse *Foxi3* (Ohyama & Groves, 2004), GAAAAGGTAATTACTGGACTC and  
521 ATGAGGCTGTTGACCATGCTG for rat *Foxi3*, CAACGTGGGCATCGGATTC and  
522 CCTCATGGTAGGCGCACT for mouse *Fgf4*, AGGCTGCGGAGACTCTACTG and  
523 GAAACTCGGTTCCCCTTCTT for rat *Fgf4*.

524

525 **Whole mount *in situ* hybridization.** Mandibles of E12-E14.5 mouse embryos and E14-  
526 E17 rat embryos were dissected for placode and primary enamel knot analysis. To be  
527 able to detect the secondary enamel knots, E16-17 mouse molars and E18-20 rat molars  
528 were separated from the mandible and the thick outer enamel epithelium was removed.  
529 All samples were fixed overnight in 4% paraformaldehyde, dehydrated to 100%  
530 methanol and stored at -20 °C. A routine *in situ* hybridization protocol (Wilkinson &  
531 Nieto, 1993) was used with the following alterations: hydrogen peroxide and  
532 glutaraldehyde were not used, proteinase K (Roche, Basel, Switzerland) was used in 7  
533 mg/ml concentration, before prehybridization samples were treated with acetic  
534 anhydride in 0.1 M triethanolamine for 10 minutes, hybridization buffer had additional  
535 50 µg/ml yeast tRNA and 1x Denhardt's solution (Invitrogen, Waltham, Massachusetts,  
536 U.S.), all post-hybridization washes were carried out using 5x SSC, 50% formamide,  
537 0.1% Tween20, blocking and antibody solutions had 1% Boehringer's blocking reagent  
538 (Roche, Basel, Switzerland), and 10% and 1% of goat serum, respectively. Alkaline-  
539 phosphatase bound anti-digoxigenin antibody (11093274910, Roche, Basel,  
540 Switzerland) was used to detect the mRNA probe. Levamisole was not used in alkaline  
541 phosphatase buffer, and BM-purple (Roche, Basel, Switzerland) was used as alkaline  
542 phosphatase substrate. Samples were imaged using Zeiss Lumar V12 stereo microscope,  
543 Apolumar S 1.2x objective and AxioCamICc1 camera.

544

545 **Placode and signaling center measurements.** The placode area, the initiation knot area  
546 and the primary enamel knot area were measured using Fiji (Schindelin et al., 2019).  
547 Samples with weak staining were excluded. When both right and left sides of the jaw  
548 were available, left side was used. The images were converted to 8-bit and pixels  
549 included in the expression area were defined as: (tissue median pixel value – expression  
550 area minimum pixel value)/2 + expression area minimum pixel value. The area enclosed  
551 by the secondary enamel knots was determined by drawing a polygon between enamel  
552 knot centers using the polygon tool in Fiji. Only teeth where at least five enamel knots  
553 were present, but without distinct development of the cusps, were measured. The tooth



554 areas were measured using polygon tool in Fiji. Randomization test with 10,000  
555 permutations in R (modified from Kuiper & Sklar, 2012) was used to test differences  
556 between samples for the placode size, initiation knot size, primary enamel knot size, the  
557 area enclosed by the secondary enamel knots, and tooth size during patterning (**Figs 2, 4,**  
558 **5B, C**). All the *p*-values are reported as two-tailed. Alternative methods to threshold the  
559 expression domains do not alter the pattern of results. Mouse strains used in controls  
560 were the same as their experimental contrasts.

561

562 **Cell size measurements.** Cell sizes of mouse and rat embryonic molars were  
563 determined by staining 6  $\mu\text{m}$  thick histological sections with DiI (Thermo Fisher  
564 Scientific, Waltham, Massachusetts, U.S.) and Hoechst nuclear stain (Invitrogen,  
565 Waltham, Massachusetts, U.S.). Sections were rehydrated gradually to RO  $\text{H}_2\text{O}$ , washed  
566 in PBS + 0.3% Triton-X, and incubated in DiI (25 mg/ml in absolute ethanol stock  
567 dissolved in PBS in 1:200 ratio) for 45 minutes. Sections were washed in PBS (4x5 min)  
568 and incubated in 1:2000 Hoechst for two hours prior to mounting. Sections were imaged  
569 using Zeiss Axio Imager.M2, AxioCam HRC camera with Zeiss 40x Plan Neofluar  
570 objective. Cell perimeters were measured using lasso tool in Fiji.

571

572 **Tooth cultures.** E13 mouse molars were dissected and cultured at 37 °C with 5%  $\text{CO}_2$   
573 using a Trowell type organ culture as described previously (Närhi & Thesleff, 2010).  
574 Media was supplemented with ascorbic acid (100  $\mu\text{g}/\text{ml}$ , Sigma-Aldrich, Burlington,  
575 Massachusetts, U.S.) and 750 ng/ml recombinant mouse IGF1 protein (791-MG-050,  
576 Bio-Techne, Minneapolis, Minnesota, U.S.) in 1x PBS + 0.1% BSA or similar volume of  
577 PBS + 0.1% BSA in controls. Samples were imaged daily using Zeiss Lumar V12 stereo  
578 microscope, Apolumar S 1.2x objective and AxioCamICc1 camera. A drop of media (7  
579  $\mu\text{l}$ ) was added on top of each sample daily to prevent the samples from drying. Media  
580 was changed every other day. The cultures were stopped when 5-6 secondary enamel  
581 knots were visible. The distribution of the secondary enamel knots was defined by  
582 drawing a polygon between enamel knot centers using the polygon tool in Fiji. The tooth  
583 areas were measured using polygon tool in Fiji.

584

585 **IGF1 induction.** E14 mouse molars were dissected and cultured in a hanging drop  
586 culture (Närhi & Thesleff, 2010) for 6 hours pairwise so that from each embryo one  
587 tooth was treated with control media and one with IGF1-containing media (media  
588 constituents and concentrations described in the previous section). Right and left sides  
589 were balanced,  $n = 5$  for both the treatments and controls.

590

591 **Transcriptomics.** Wild type tooth germs were dissected from E13, E15 and E16 mouse  
592 molars. Teeth of corresponding morphological stages were dissected from E15, E17 and  
593 E18 rats. Minimal amount of surrounding tissue was left around the tooth germ, at the  
594 same time making sure that the tooth was not damaged in the process. The tissue was  
595 immediately stored in RNAlater (Qiagen, Düsseldorf, Germany) at  $-80$  °C for RNAseq.  
596 For RNAseq, each tooth was handled individually. Seven biological replicates were  
597 collected for mouse and five biological replicates for rat. Numbers of left and right teeth  
598 were balanced. The samples of IGF1 induction experiment were processed similarly.  
599 Samples were homogenized in TRI Reagent (Merck) using Precellys 24-homogenizer  
600 (Bertin Instruments). RNA was extracted by guanidium thiocyanate-phenol-chloroform  
601 method and purified using RNeasy Plus micro kit (Qiagen GmbH). The RNA quality of  
602 representative samples was confirmed using 2100 Bioanalyzer (Agilent). The purity of  
603 RNA was analyzed using Nanodrop (Thermo Fisher Scientific). RNA concentration was

604 measured by Qubit 3.0 (Thermo Fisher Scientific). The complementary DNA (cDNA)  
605 libraries were prepared using Ovation Mouse RNAseq System and Ovation Rat RNAseq  
606 System (Tecan). Gene expression levels were measured using RNAseq (platforms  
607 GPL19057, Illumina NextSeq 500). The RNAseq reads of mouse and rat were evaluated  
608 and bad reads were filtered out using FastQC (version 0.11.8, Andrews et al., 2012),  
609 AfterQC (version 0.9.6, Chen et al., 2017) and Trimmomatic (version 0.39, Bolger et al.,  
610 2014), and ribosomal RNA was removed using Sortmerna (Kopylova et al., 2012). The  
611 number of remaining, good reads varied between 30M and 90M in the rat samples and  
612 40M and 65M in the mouse samples, and 8.9M and 22.7M reads for IGF1-induction  
613 experiment. Mouse and rat reads were aligned using Salmon (version 0.99.0, Patro et al.,  
614 2017) to GRCm38 (Ensembl release 100) cDNA and Rnor\_6.0 (Ensembl release 99)  
615 cDNA, respectively. For mouse and rat comparison, 16,604 one-to-one orthologous  
616 genes were found between mouse and rat using Ensembl Biomart tool (version 2.50.3,  
617 Kinsella et al., 2011). 126 additional one-to-one orthologues were added using  
618 Inparanoid8 (Sonnhammer & Östlund, 2015) in which gene pairs with bootstrap scores  
619 of 100% were selected. Only these one-to-one-orthologues found with Biomart and  
620 Inparanoid8 (version 8.0, data downloaded on June 2020) were used for further analysis.  
621 The mouse and rat output transcript ID's of Salmon were converted to mouse gene ID's  
622 using EnsemblDb (Rainer et al., 2019) and Tximport (version 1.22.0, Soneson et al.,  
623 2015), allowing comparison of mouse and rat read counts. Deseq2 (version 1.34.0, Love  
624 et al., 2014) was used to normalise the read counts by library size and composition as  
625 well as transcript length. For Gene Ontology (GO) term analyses of biological processes,  
626 PANTHER 17.0 (Thomas et al., 2022) was used to examine up- and downregulated  
627 genes of the IGF1-induction experiment. Fold enrichment analysis was done using  
628 PANTHER overrepresentation test (Release 20221013, GO Ontology database DOI:  
629 10.5281/zenodo.6799722 Released 2022-07-01) with default Fisher's exact test and  
630 False Discovery Rate correction (Huaiyu et al., 2019). All transcriptome data are  
631 available in GEO at <https://www.ncbi.nlm.nih.gov/geo/query/acc.cgi>, reference numbers  
632 GSE142199, GSE158697, and GSE218338.

633

634 **Computational modeling.** ToothMaker (Harjunmaa et al., 2014) was used to  
635 investigate the scaling of mouse molar simulations used in previous studies (Harjunmaa  
636 et al., 2014; Renvoise et al., 2017, **Table S8**). The model implements experimentally  
637 inferred genetic interactions with tissue biomechanics to simulate tooth development.  
638 The logic of the model is morphodynamic (Salazar-Ciudad & Jernvall, 2010) in that  
639 signaling regulating patterning happens concomitantly with growth. Starting from  
640 parameters used previously to simulate mouse molar development (Harjunmaa et al.,  
641 2014; Renvoise et al., 2017), we systematically increased the mesenchymal proliferation  
642 rate (*Mgr*) and decreased the auto-activation of activator (*Act*). These changes simulate  
643 increases in growth and inhibition of patterning, respectively (**Table S8**). All simulations  
644 were run for the same number of iterations (14,000), which cover the development up to  
645 early bell stage (approximately five days after the placode stage). ToothMaker is  
646 available at <https://github.com/jernvall-lab/ToothMaker>.

647

#### 648 **Acknowledgements**

649 We thank M. Fortelius, V. Hietakangas, J. Laakkonen, M. Mikkola, I. Salazar-Ciudad,  
650 K. Kavanagh, and members of Jernvall lab for comments and discussions on this work;  
651 N. Di-Poï and J. Laakkonen for help with comparative material; H. Suhonen for help  
652 with microCT imaging; A. Viherä, R. Savolainen, R. Murray, M. Mäkinen, O.  
653 Saarnisalo, and M. G. Varghese for technical assistance; P. Auvinen, L. Paulin and P.

654 Laamanen at DNA Sequencing and Genomics Laboratory; RIKEN BioResource Center  
655 through the National Bio-Resource Project of the MEXT, Ibaraki, Japan providing the  
656 Fucci mice; P. Giere (Museum für Naturkunde, Berlin) and J. Granroth (Finnish  
657 Museum of Natural History, Helsinki) for access and help with museum collections. For  
658 access to and assistance with *Loxodonta* specimens, R.J.A. thanks F. Stansfield, L.  
659 Hautier, and the late R. T. Allen. This study was supported by the Academy of Finland,  
660 Sigrid Jusélius Foundation, and John Templeton Foundation (J.J.), Doctoral Programme  
661 in Biomedicine (M.M.C.), and by NIDCR R01-DE027620 and R35-DE026602 (T.J.H.  
662 and O.D.K.).

663

#### 664 **Author contributions**

665 M.M.C. and J.J. conceived the project. M.M.C. and V.V. obtained and M.M.C., O.E.S.  
666 and J.J. analyzed the phenotypic data. M.M.C. performed culturing experiments and  
667 measurements. M.M.C., O.H., and R.D.R. performed transcriptomics. T.J.H. developed  
668 computational tools. M.M.C. and J.J. compiled the comparative data. J.-C.F., M.H.,  
669 R.J.A., and O.D.K. contributed materials, observations and scientific interpretations.  
670 M.M.C. and J.J. integrated the analyses and wrote the paper with input from all authors.

671

#### 672 **REFERENCES**

- 673 Alroy, J. (1998). Cope's Rule and the Dynamics of Body Mass Evolution in North American  
674 Fossil Mammals. *Science*, 280(5364), 731-734. doi: 10.1126/science.280.5364.731
- 675 Alvesalo, L., & Tigerstedt, P. M. A. (1974). Heritabilities of human tooth  
676 dimensions. *Hereditas*, 77, 311–318. doi: 10.1111/j.1601-5223.1974.tb00943.x
- 677 Andrews, S. (2010). FastQC: A Quality Control Tool for High Throughput Sequence Data  
678 [Online]. Available online at: <http://www.bioinformatics.babraham.ac.uk/projects/fastqc/>
- 679 Bolger, A. M., Lohse, M., & Usadel, B. (2014). Trimmomatic: a flexible trimmer for Illumina  
680 sequence data. *Bioinformatics*, 30(15), 2114-2120. doi: 10.1093/bioinformatics/btu170
- 681 Boulan, L., & Léopold, P. (2021). What determines organ size during development and  
682 regeneration? *Development*, 148(1), 1-9. doi: 10.1242/dev.196063
- 683 Butler, P. M. (1967). The prenatal development of the human first upper permanent  
684 molar. *Archives of Oral Biology*, 12(4), 551–563. doi: 10.1016/0003-9969(67)90030-1
- 685 Cai, J., Cho, S.-W., Kim, J.-Y., Lee, M.-J., Cha, Y.-G., & Jung, H.-S. (2007). Patterning the size  
686 and number of tooth and its cusps. *Developmental Biology*, 304(2), 499-507. doi:  
687 10.1016/j.ydbio.2007.01.002
- 688 Chen, S., Huang, T., Zhou, Y., Han, Y., Xu, M., & Gu, J. (2017). AfterQC: automatic filtering,  
689 trimming, error removing and quality control for fastq data. *BMC Bioinformatics*, 18(Suppl  
690 3), 80. doi: 10.1186/s12859-017-1469-3
- 691 Clauss, M., Heck, L., Veitschegger, K., & Geiger, M. (2022). Teeth out of proportion: Smaller  
692 horse and cattle breeds have comparatively larger teeth. *Journal of Experimental Zoology  
693 Part B: Molecular and Developmental Evolution*. doi: 10.1002/jez.b.23128
- 694 Copes, L. E., & Schwartz, G. T. (2010). The scale of it all: postcanine tooth size, the taxon-level  
695 effect, and the universality of Gould's scaling law. *Paleobiology*, 36(2), 188-203. doi:  
696 10.1666/08089.1
- 697 Couzens, A. M. C., Sears, K. E., & Rücklin, M. (2021). Developmental influence on  
698 evolutionary rates and the origin of placental mammal tooth complexity. *Proceedings of the  
699 National Academy of Sciences*, 118(23), e2019294118. doi: 10.1073/pnas.2019294118
- 700 Damuth J. & MacFadden B. J. (1990). Body size in mammalian paleobiology: Estimation and  
701 biological implications. Cambridge University Press.
- 702 D'Ambrosia, A., Clyde, W. C., Fricke, H. C., Gingerich, P. D. & Abels, H. A. (2017). Repetitive  
703 mammalian dwarfing during ancient greenhouse warming events. *Science Advances*, 3, doi:  
704 10.1126/sciadv.1601430

- 705 Dupont, J., & Holzenberger, M. (2003). Biology of insulin-like growth factors in development.  
706 *Birth Defects Research Part C: Embryo Today: Reviews*, 69(4), 257-271. doi:  
707 10.1002/bdrc.10022
- 708 Evans, A. R., Wilson, G. P., Fortelius, M., & Jernvall, J. (2007). High-level similarity of  
709 dentitions in carnivorans and rodents. *Nature*, 445(7123), 78-81. doi: 10.1038/nature05433
- 710 Gaunt, W. A. (1959). The development of the deciduous cheek teeth of the cat. *Acta*  
711 *Anatomica*, 38, 187–212. doi: 10.1159/000141527
- 712 Gaunt, W. A. (1961). The development of the molar pattern of the golden hamster (*Mesocricetus*  
713 *auratus* W.), together with a re-assessment of the molar pattern of the mouse (*Mus*  
714 *musculus*). *Acta Anatomica*, 45, 219–251. doi: 10.1159/000141753
- 715 Gill, P. G., Purnell, M. A., Crumpton, N., Brown, K. R., Gostling, N. J., Stampanoni, M., &  
716 Rayfield, E. J. (2014). Dietary specializations and diversity in feeding ecology of the  
717 earliest stem mammals. *Nature*, 512(7514), 303-305. doi: 10.1038/nature13622
- 718 Gingerich, P. D., Smith, B. H., & Rosenberg, K. (1982). Allometric scaling in the dentition of  
719 primates and prediction of body weight from tooth size in fossils. *American Journal of*  
720 *Physical Anthropology*, 58(1), 81-100. doi: 10.1002/ajpa.1330580110
- 721 Hallikas, O., Roy, R. D., Christensen, M. M., Renvoisé, E., Sulic, A., & Jernvall, J. (2021).  
722 System-level analyses of keystone genes required for mammalian tooth development.  
723 *Journal of Experimental Zoology Part B: Molecular and Developmental Evolution*, 336(1),  
724 7-17. doi: 10.1002/jez.b.23009
- 725 Hammer, Ø., Harper, D.A.T., Ryan, P.D. (2001). PAST: Paleontological statistics software  
726 package for education and data analysis. *Palaeontologia Electronica* 4(1): 9pp.
- 727 Harjunmaa, E., Seidel, K., Häkkinen, T., Renvoisé, E., Corfe, I. J., Kallonen, A., ... Jernvall, J.  
728 (2014). Replaying evolutionary transitions from the dental fossil record. *Nature*, 512(7512),  
729 44-48. doi: 10.1038/nature13613
- 730 Harmansa, S., & Lecuit, T. (2021). Forward and feedback control mechanisms of developmental  
731 tissue growth. *Cells & Development*, 168, 203750. doi: 10.1016/j.cdev.2021.203750
- 732 Holzenberger, M., Leneuve, P., Hamard, G., Ducos, B., Perin, L., Binoux, M., & Bouc, Y. L.  
733 (2000). A Targeted Partial Invalidation of the Insulin-Like Growth Factor I Receptor Gene  
734 in Mice Causes a Postnatal Growth Deficit. *Endocrinology*, 141(7), 2557-2566. doi:  
735 10.1210/endo.141.7.7550
- 736 Holzenberger, M., Dupont, J., Ducos, B., Leneuve, P., Gélöën, A., Even, P. C., ... Bouc, Y. L.  
737 (2003). IGF-1 receptor regulates lifespan and resistance to oxidative stress in mice. *Nature*,  
738 421(6919), 182-187. doi: 10.1038/nature01298
- 739 Hovorakova, M., Lesot, H., Peterka, M., & Peterkova, R. (2005). The developmental  
740 relationship between the deciduous dentition and the oral vestibule in human  
741 embryos. *Anatomy and Embryology*, 209(4), 303–313. doi: 10.1007/s00429-004-0441-y
- 742 Hovorakova, M., Lesot, H., Peterka, M., & Peterkova, R. (2018). Early development of the  
743 human dentition revisited. *Journal of Anatomy*, 233(2), 135–145. doi: 10.1111/joa.12825
- 744 Hopkins, S.S.B. (2018). Estimation of Body Size in Fossil Mammals. In: Croft, D., Su, D.,  
745 Simpson, S. (eds) *Methods in Paleoecology. Vertebrate Paleobiology and*  
746 *Paleoanthropology*. Springer, Cham. doi: 10.1007/978-3-319-94265-0\_2
- 747 Huaiyu, M., Muruganujan, A., Huang, J. X., Ebert, D., Mills, C., Guo, X. & Thomas, P. D.  
748 (2019). Protocol Update for large-scale genome and gene function analysis with the  
749 PANTHER classification system (v.14.0). *Nature Protocols* 14, 703–721. doi:  
750 10.1038/s41596-019-0128-8
- 751 Ishida, K., Murofushi, M., Nakao, K., Morita, R., Ogawa, M., & Tsuji, T. (2011). The regulation  
752 of tooth morphogenesis is associated with epithelial cell proliferation and the expression of  
753 Sonic hedgehog through epithelial-mesenchymal interactions. *Biochemical and Biophysical*  
754 *Research Communications*, 405(3), 455-461. doi: 10.1016/j.bbrc.2011.01.052
- 755 Jia, S., Zhou, J., Gao, Y., Baek, J.-A., Martin, J. F., Lan, Y. & Jiang, R. (2013). Roles of Bmp4  
756 during tooth morphogenesis and sequential tooth formation. *Development*, 140, 423-432.  
757 doi: 10.1242/dev.081927
- 758 Jing, J., Feng, J., Yan, Y., Guo, T., Lei, J., Pei, F., Ho, T.-V. & Chai, Y. (2022). Spatiotemporal  
759 single-cell regulatory atlas reveals neural crest lineage diversification and cellular function



- 760 during tooth morphogenesis. *Nature Communications*, 13, 4803. doi: 10.1038/s41467-022-  
761 32490-y
- 762 Jernvall, J. (1995). Mammalian molar cusp patterns: Developmental mechanisms of diversity.  
763 *Acta Zoologica Fennica*, 198, 1-61.
- 764 Jernvall, J., Keränen, S. V. E., & Thesleff, I. (2000). Evolutionary modification of development  
765 in mammalian teeth: Quantifying gene expression patterns and topography. *Proceedings of*  
766 *the National Academy of Sciences*, 97(26), 14444-14448. doi: 10.1073/pnas.97.26.14444
- 767 Joseph, B. K., Savage, N. W., Daley, T. J., & Young, W. G. (1996). In Situ Hybridization  
768 Evidence for a Paracrine/Autocrine Role for Insulin-Like Growth Factor-I in Tooth  
769 Development. *Growth Factors*, 13(1-2), 11-17. doi: 10.3109/08977199609034563
- 770 Järvinen, E., Salazar-Ciudad, I., Birchmeier, W., Taketo, M. M., Jernvall, J., & Thesleff, I.  
771 (2006). Continuous tooth generation in mouse is induced by activated epithelial Wntbeta-  
772 catenin signaling. *Proceedings of the National Academy of Sciences*, 103(49), 18627-18632.  
773 doi: /10.1073/pnas.0607289103
- 774 Järvinen, E., Välimäki, K., Pummila, M., Thesleff, I., & Jernvall, J. (2008). The taming of the  
775 shrew milk teeth. *Evolution & Development*, 10(4), 477-486. doi: 10.1111/j.1525-  
776 142x.2008.00258.x.
- 777 Kinsella, R. J., Kähäri, A., Haider, S., Zamora, J., Proctor, G., Spudich, G., ... Flicek, P. (2011).  
778 Ensembl BioMarts: a hub for data retrieval across taxonomic space. *Database*, 2011(0),  
779 bar030. doi: 10.1093/database/bar030
- 780 Koffi, K. A., Doublier, S., Ricort, J.-M., Babajko, S., Nassif, A. & Isaac, J. (2021). The Role of  
781 GH/IGF Axis in Dento-Alveolar Complex from Development to Aging and Therapeutics: A  
782 Narrative Review. *Cells*, 10, 1181. doi.org/ 10.3390/cells10051181
- 783 Kopylova, E., Noé, L., & Touzet, H. (2012). SortMeRNA: fast and accurate filtering of  
784 ribosomal RNAs in metatranscriptomic data. *Bioinformatics*, 28(24), 3211-3217. doi:  
785 10.1093/bioinformatics/bts611
- 786 Kuiper, S. & Sklar, J. (2012). Practicing statistics: Guided investigations for the second course.  
787 Pearson Higher Ed.
- 788 Lafuma, F., Corfe, I. J., Clavel, J., & Di-Poi, N. (2021). Multiple evolutionary origins and losses  
789 of tooth complexity in squamates. *Nature Communications*, 12(1), 6001. doi:  
790 10.1038/s41467-021-26285-w
- 791 LeRoith, D., Holly J. M. P. & Forbes, B. E. (2021). Insulin-like growth factors: Ligands, binding  
792 proteins, and receptors. *Molecular Metabolism*, 52, 101245. doi:  
793 10.1016/j.molmet.2021.101245
- 794 Larionova, D., Lesot, H. & Huyseune, A. (2021). Miniaturization: How many cells are needed  
795 to build a tooth? *Developmental Dynamics* 250, 1021-1035. doi: 10.1002/dvdy.300
- 796 Love, M. I., Huber, W., & Anders, S. (2014). Moderated estimation of fold change and  
797 dispersion for RNA-seq data with DESeq2. *Genome Biology*, 15(12), 550. doi:  
798 10.1186/s13059-014-0550-8
- 799 Luo, Z.-X. (2007). Transformation and diversification in early mammal evolution. *Nature*,  
800 450(7172), 1011-1019. doi: 10.1038/nature06277
- 801 Metscher, B. D. (2009). MicroCT for comparative morphology: simple staining methods allow  
802 high-contrast 3D imaging of diverse non-mineralized animal tissues. *BMC Physiol* 9, 11.  
803 doi.org/10.1186/1472-6793-9-11
- 804 Mogollón, I., Moustakas-Verho, J. E., Niittykoski, M., & Ahtiainen, L. (2021). The initiation  
805 knot is a signaling center required for molar tooth development. *Development*, (9). doi:  
806 10.1242/dev.194597
- 807 Nasrullah, G., Renfree, M. & Evans, A. R. (2022). From embryo to adult: the complete  
808 development and unusual replacement of the dentition of the tammar wallaby (*Macropus*  
809 *eugenii*). *Journal of Mammalian Evolution*, 29, 515-529. doi.org/10.1007/s10914-021-  
810 09597-y
- 811 Närhi, K., & Thesleff, I. (2010). Oral Biology, Molecular Techniques and Applications. *Methods*  
812 *in Molecular Biology*, 666, 253-267. doi: 10.1007/978-1-60761-820-1\_16
- 813 Ohyama, T. & Groves, A. K. (2004). Expression of mouse Foxi class genes in early craniofacial  
814 development. *Developmental Dynamics* 231(3), 640-646. doi: 10.1002/dvdy.20160.



- 815 Oyanagi, T., Takeshita, N., Hara, M., Ikeda, E., Chida, T., Seki, D., ... Takano-Yamamoto, T.  
816 (2019). Insulin-like growth factor 1 modulates bioengineered tooth morphogenesis.  
817 *Scientific Reports*, 9(1), 368. doi: 10.1038/s41598-018-36863-6
- 818 Pampush, J. D., Winchester, J. M., Morse, E., Paul, A. Q., Vining, D. M., Boyer, Doug & R. F.,  
819 Kay (2016). Introducing molaR: a new R package for quantitative topographic analysis of  
820 teeth (and other topographic surfaces). *Journal of Mammalian Evolution* 23(4), 397-412.  
821 doi: 10.1007/s10914-016-9326-0
- 822 Parker, J. (2011). Morphogens, nutrients, and the basis of organ scaling. *Evolution &*  
823 *Development*, 13(3), 304-314. doi: 10.1111/j.1525-142x.2011.00481.x
- 824 Patro, R., Duggal, G., Love, M. I., Irizarry, R. A., & Kingsford, C. (2017). Salmon provides fast  
825 and bias-aware quantification of transcript expression. *Nature Methods*, 14(4), 417-419.  
826 doi: 10.1038/nmeth.4197
- 827 Peters, R. (1983). *The Ecological Implications of Body Size*. Cambridge: Cambridge University  
828 Press. doi:10.1017/CBO9780511608551
- 829 Rainer, J., Gatto, L., & Weichenberger, C. X. (2019). ensemblDb: an R package to create and use  
830 Ensembl-based annotation resources. *Bioinformatics*, 35(17), btz031. doi:  
831 10.1093/bioinformatics/btz031
- 832 Renvoisé, E., Kavanagh, K. D., Lazzari, V., Häkkinen, T. J., Rice, R., Pantalacci, S., ... Jernvall,  
833 J. (2017). Mechanical constraint from growing jaw facilitates mammalian dental diversity.  
834 *Proceedings of the National Academy of Sciences*, 114(35), 9403-9408. doi:  
835 10.1073/pnas.1707410114
- 836 Sakaue-Sawano, A., Kurokawa, H., Morimura, T., Hanyu, A., Hama, H., Osawa, H., ...  
837 Miyawaki, A. (2008). Visualizing Spatiotemporal Dynamics of Multicellular Cell-Cycle  
838 Progression. *Cell*, 132(3), 487-498. doi: 10.1016/j.cell.2007.12.033
- 839 Salazar-Ciudad, I. & Jernvall, J. (2010). A computational model of teeth and the developmental  
840 origins of morphological variation. *Nature* 464, 583-586. doi: 10.1038/nature08838
- 841 Sasaki, T., Ito, Y., Xu, X., Han, J., Bringas Jr. P., Maeda, T., Slavkin, H. C., Grosschedl, R. &  
842 Chai, Y. (2005). LEF1 is a critical epithelial survival factor during tooth morphogenesis.  
843 *Developmental Biology*, 278, 130-143. doi.org/10.1016/j.ydbio.2004.10.021
- 844 Savriama, Y., Valtonen, M., Kammonen, J. I., Rastas, P., Smolander, O.-P., Lyyski, A., ...  
845 Jernvall, J. (2018). Bracketing phenogenotypic limits of mammalian hybridization. *Royal*  
846 *Society Open Science*, 5(11), 180903. doi: 10.1098/rsos.180903
- 847 Schindelin, J., Arganda-Carreras, I., Frise, E., Kaynig, V., Longair, M., Pietzsch, T., ... Cardona,  
848 A. (2012). Fiji: an open-source platform for biological-image analysis. *Nature Methods*,  
849 9(7), 676-682. doi: 10.1038/nmeth.2019
- 850 Shirokova, V., Jussila, M., Hytönen, M. K., Perälä, N., Drögemüller, C., Leeb, T., ... Mikkola,  
851 M. L. (2013). Expression of Foxi3 is regulated by ectodysplasin in skin appendage  
852 placodes. *Developmental Dynamics*, 242(6), 593-603. doi: 10.1002/dvdy.23952
- 853 Sjögren, K., Liu, J.-L., Blad, K., Skrtic, S., Vidal, O., Wallenius, V., ... Ohlsson, C. (1999).  
854 Liver-derived insulin-like growth factor I (IGF-I) is the principal source of IGF-I in blood  
855 but is not required for postnatal body growth in mice. *Proceedings of the National Academy*  
856 *of Sciences*, 96(12), 7088-7092. doi: 10.1073/pnas.96.12.7088
- 857 Smith, F. A., Boyer, A. G., Brown, J. H., Costa, D. P., Dayan, T., Ernest, 4 S. K. Morgan, ...  
858 Uhen, M. D. (2010). The Evolution of Maximum Body Size of Terrestrial Mammals.  
859 *Science*, 330(6008), 1216-1219. doi: 10.1126/science.1194830
- 860 Smith, F. A., Payne, J. L., Heim, N. A., Balk, M. A., Finnegan, S., Kowalewski, M., ... Wang, S.  
861 C. (2016). Body Size Evolution Across the Geozoic. *Annual Review of Earth and Planetary*  
862 *Sciences*, 44(1), 1-31. doi: 10.1146/annurev-earth-060115-012147
- 863 Sokal, R. R. & Rohlf, F. J. (1995). *Biometry* (Freeman, New York).
- 864 Sonesson, C., Love, M. I., & Robinson, M. D. (2016). Differential analyses for RNA-seq:  
865 transcript-level estimates improve gene-level inferences. *F1000Research*, 4, 1521. doi:  
866 10.12688/f1000research.7563.2
- 867 Sonhammer, E. L. L., & Östlund, G. (2015). InParanoid 8: orthology analysis between 273  
868 proteomes, mostly eukaryotic. *Nucleic Acids Research*, 43(D1), D234-D239. doi:  
869 10.1093/nar/gku1203

- 870 Streelman, J. T., Webb, J. F., Albertson, R. C., & Kocher, T. D. (2003). The cusp of evolution  
871 and development a model of cichlid tooth shape.pdf. *Evolution and Development*, 5(6),  
872 600-608. doi: <https://doi.org/10.1046/j.1525-142X.2003.03065.x>
- 873 Sutter, N. B., Bustamante, C. D., Chase, K., Gray, M. M., Zhao, K., Zhu, L., ... Ostrander, E. A.  
874 (2007). A Single IGF1 Allele Is a Major Determinant of Small Size in Dogs. *Science*,  
875 316(5821), 112-115. doi: 10.1126/science.1137045
- 876 Thiery, A. P., Standing, A. S., Cooper, R. L., & Fraser, G. J. (2022). An epithelial signalling  
877 centre in sharks supports homology of tooth morphogenesis in vertebrates. *ELife*, 11,  
878 e73173. doi: 10.7554/elife.73173
- 879 Thomas, P. D., Ebert, D., Muruganujan, A., Mushayahama, T., Albou, L.-P. & Huaiyu, M.  
880 (2022). PANTHER: Making genome-scale phylogenetics accessible to all. *Protein Society*  
881 31, 8–22. doi:10.1002/pro.4218
- 882 Wilkinson, D. G., & Nieto, M. A. (1993). Detection of Messenger RNA by in Situ Hybridization  
883 to Tissue Sections and Whole Mounts. *Methods in Enzymology*, 225, 361-373. doi:  
884 10.1016/0076-6879(93)25025-w.
- 885 Winchester, J. M. (2016). MorphoTester: An Open Source Application for Morphological  
886 Topographic Analysis. *PLoS ONE* 11(2): e0147649. doi.org/10.1371/journal.pone.0147649
- 887 Woods, K. A., Camacho-Hübner, C., Savage, M. O., & Clark, A. J. L. (1996). Intrauterine  
888 growth retardation and postnatal growth failure associated with deletion of the insulin-like  
889 growth factor I gene. *The New England Journal of Medicine*, 355(18), 1363-1367. doi:  
890 10.1056/NEJM199610313351805.
- 891 Wu, Z., & Guan, K.-L. (2020). Hippo Signaling in Embryogenesis and Development. *Trends in*  
892 *Biochemical Sciences*, 46(1), 51-63. doi: 10.1016/j.tibs.2020.08.008
- 893 Young, W.G., Ruch, J.V., Stevens, M.R., Bègue-Kirn, C., Zhang, C.Z., Lesot, H. & Waters MJ.  
894 (1995) Comparison of the effects of growth hormone, insulin-like growth factor-I and fetal  
895 calf serum on mouse molar odontogenesis in vitro. *Archives of Oral Biology*, 40(9):789-99.  
896 doi: 10.1016/0003-9969(95)00051-p.  
897  
898
